# Supplementary material
Source: MDPI journal article supplement (https://www.mdpi.com/2075-4701/12/8/1386)
Supplement: s1 [file s1]

# Effect of Microstructure Changes on the Mechanical and Electrochemical Properties of Mild Steel Under Chlorine-rich and Chlorine-free Media at different pHs

Shahid Parapurath<sup>1</sup>, Liyamol Jacob<sup>2</sup>, Ebru Gunister<sup>3</sup> and Nader Vahdati<sup>1,\*</sup>

<sup>1</sup> Department of Mechanical Engineering, Khalifa University of Science and Technology, SAN Campus, P.O. Box 127788, Abu Dhabi, United Arab Emirates.

<sup>1\*</sup> Department of Mechanical Engineering, Khalifa University of Science and Technology, Healthcare Engineering Innovation Center, P.O. Box 127788, Abu Dhabi, United Arab Emirates.

<sup>2</sup> Department of Chemical Engineering, Khalifa University of Science and Technology, SAN Campus, P.O. Box 127788, Abu Dhabi, United Arab Emirates.

<sup>3</sup> Department of Mechanical Engineering, Istanbul Health and Technology University, 34015, Istanbul, Turkey

\* Correspondence: nader.vahdati@ku.ac.ae

| Samples       | pH 4 | pH 7 | pH 10 |
|---------------|------|------|-------|
| Original NaCl |      |      |       |
| Quenched NaCl |      |      |       |
| Tempered NaCl |      |      |       |

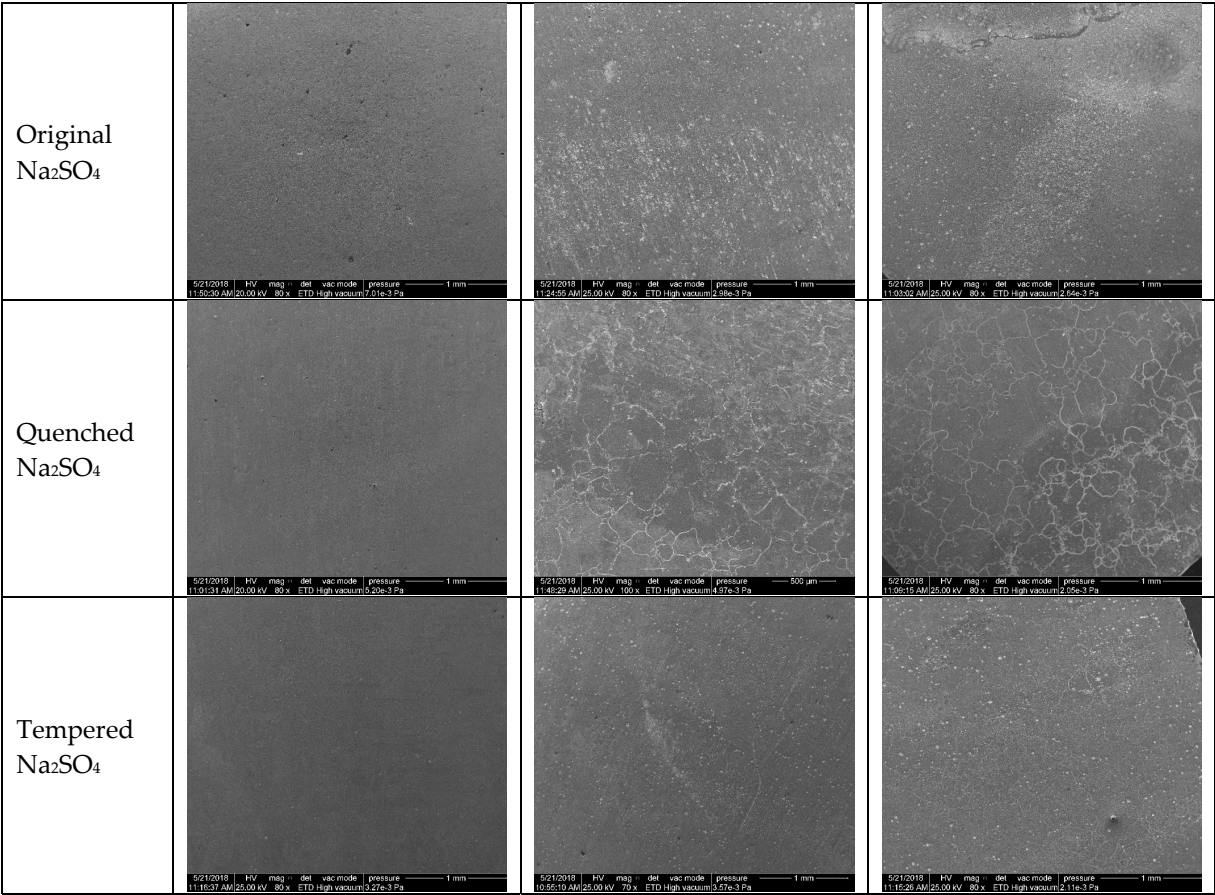

Figure S1. Macroscopic images of the corroded surface by SEM.

|                                 |                                                                                                                              |                                                                                                                                |                                                                                                                          |
|---------------------------------|------------------------------------------------------------------------------------------------------------------------------|--------------------------------------------------------------------------------------------------------------------------------|--------------------------------------------------------------------------------------------------------------------------|
| NaCl                            | 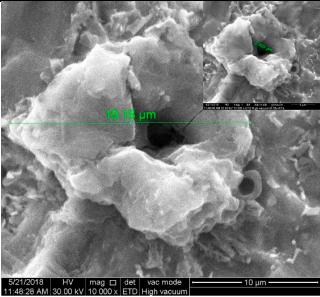<br>Original at pH 4<br>(19.18μm[2.429 μm]) | <br>Original at pH 10<br>(37.19μm[10.23 μm]) |                                                                                                                          |
|                                 | <br>Tempered at pH 4<br>(19.61 μm)          | <br>Tempered at pH 7<br>(20.32 μm)           | <br>Tempered at pH 10<br>(24.83 μm)   |
|                                 |                                                                                                                              |                                                                                                                                |                                                                                                                          |
| Na <sub>2</sub> SO <sub>4</sub> | <br>Original at pH 7 (14.39 μm)           | <br>Original at pH 10 (22.35 μm)           |                                                                                                                          |
|                                 | <br>Tempered at pH 4<br>(17.51 μm)        | <br>Tempered at pH 7<br>(24.63 μm)         | <br>Tempered at pH 10<br>(24.83 μm) |
|                                 |                                                                                                                              |                                                                                                                                |                                                                                                                          |

Figure S2. SEM images of pits formed during corrosion
